# Supplementary material for: The ethical issues regarding consent to clinical trials with pre-term or sick neonates: a systematic review (framework synthesis) of the empirical research
Source: Springer Nature journal article supplement (doi:10.1186/s13063-015-0957-x), 2015-11-04

Additional file 2 PRISMA Flow Diagram

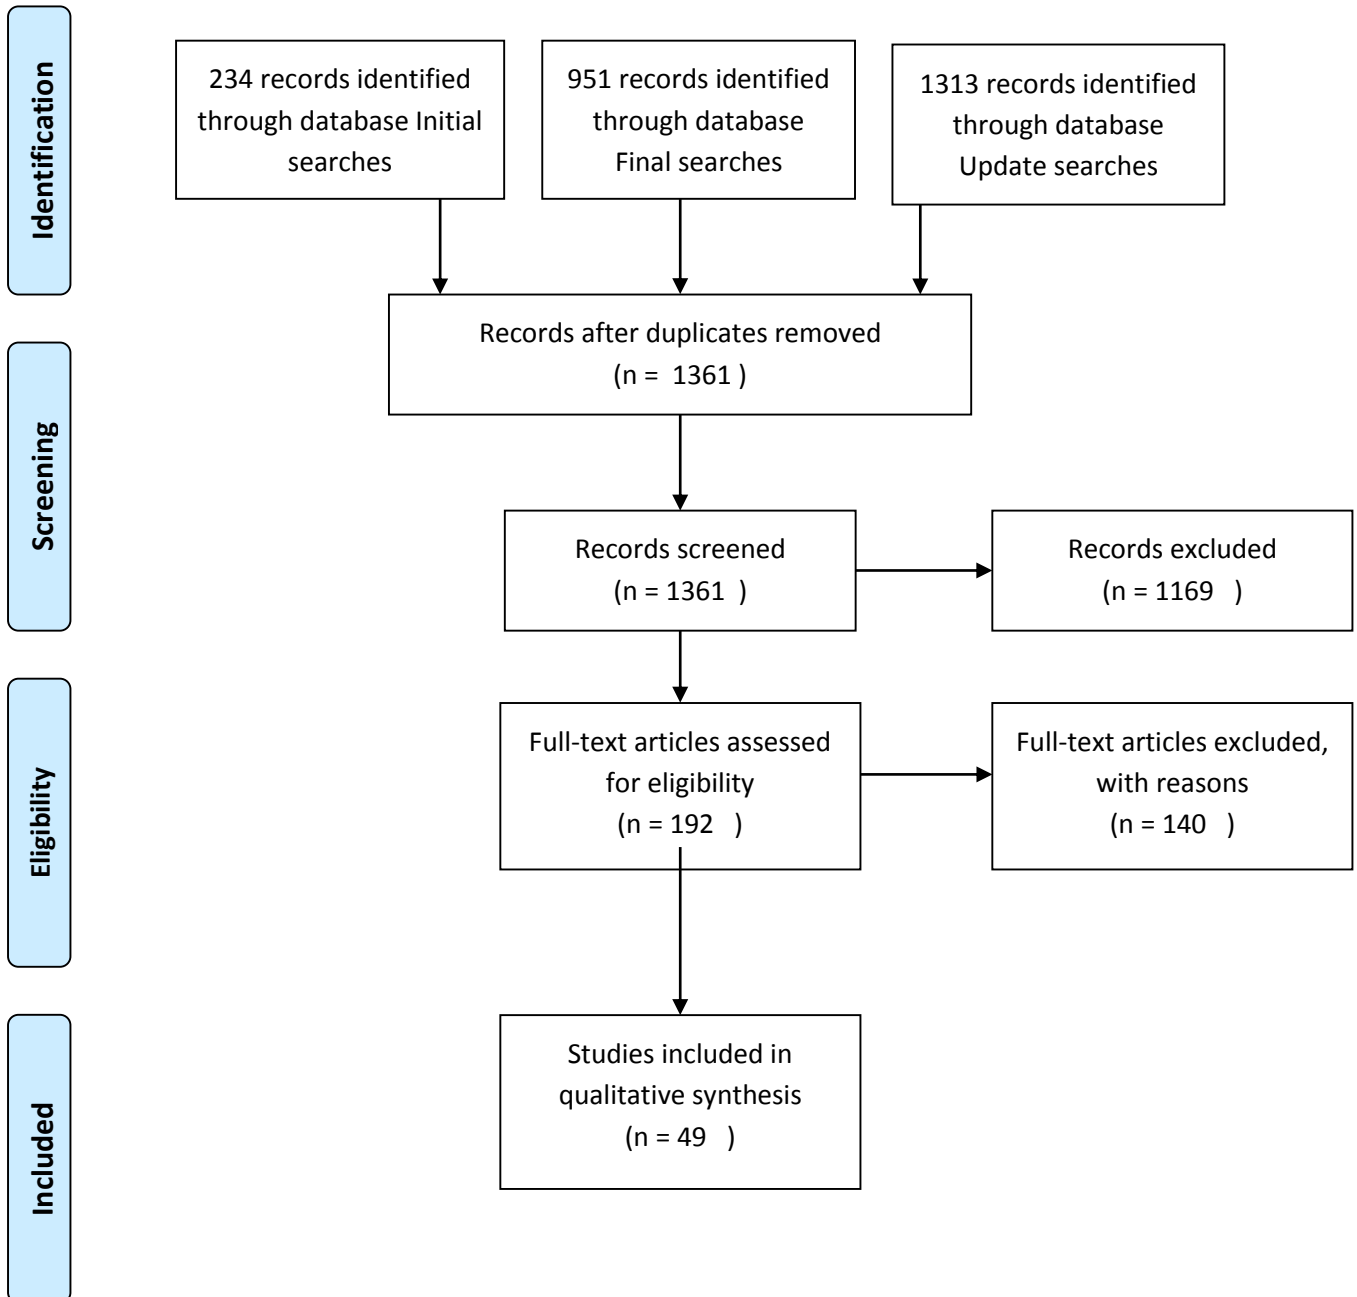

Supplement: MOESM2 [file 9782540]
