# Supplementary material for: The ethical issues regarding consent to clinical trials with pre-term or sick neonates: a systematic review (framework synthesis) of the empirical research
Source: Springer Nature journal article supplement (doi:10.1186/s13063-015-0957-x), 2015-11-04
Supplement: MOESM4 [file 9782540]

**Additional file 4** : The Evaluation of the Quality of the Empirical Studies Included in the Review

|                      | <b>Is it clear whose perspective is offered?</b>                                                                                          | <b>Are the data collection and analysis methods clearly described?</b>                                                                                                                          | <b>Were questions for data collection open or closed? Was the analysis grounded in the data or framed externally?</b> |
|----------------------|-------------------------------------------------------------------------------------------------------------------------------------------|-------------------------------------------------------------------------------------------------------------------------------------------------------------------------------------------------|-----------------------------------------------------------------------------------------------------------------------|
| Albersheim 2010 [40] | Yes, practicing neonatologists in Canada                                                                                                  | Yes, semi-structured interviews and comments on scenarios<br>Yes, thematic analysis of interviews and quantitative analysis of responses to scenarios                                           | Open and closed questions.<br>Externally framed analysis                                                              |
| Allmark 2006 [47]    | Yes, parents who gave consent to the TOBY trial and clinicians who sought it, in UK                                                       | Yes, semi-structured interviews<br>Yes, framework analysis                                                                                                                                      | Open questions<br>Flexibly framed analysis                                                                            |
| Ballard 2004 [46]    | Yes, parents of newborns enrolled to the NEOPAIN study in Kentucky, USA                                                                   | Yes, open ended questions.<br>Yes, questions translated into a closed Likert score and analysed quantitatively                                                                                  | Open questions<br>Externally framed analysis                                                                          |
| Ballard 2011 [51]    | Yes, parents of newborns enrolled to a specific phase II study in the Neonatal Intensive Care Unit at the University of Kentucky, USA     | Yes, open ended questions asked during a controlled trial comparing standard consent with enhanced consent.<br>Yes, questions translated into a closed Likert score and analysed quantitatively | Open questions<br>Externally framed analysis                                                                          |
| Brinchmann 2002 [36] | Yes, parents who had experienced one or more life-and-death decisions relating to their critically ill and/or premature infant, in Norway | Yes, in-depth interviews<br>Yes, thematic analysis discussed in the light of theories of ethics                                                                                                 | Open questions<br>Emergent themes framed by theories of ethics                                                        |
| Burgess 2003 [25]    | Yes, parents who agreed, and those who refused, to enrol their newborns into trials in a NICU in a tertiary care referral centre, Canada  | Yes, questionnaire with Likert scale and 3 open questions<br>Yes, quantitative analysis                                                                                                         | Closed and open questions<br>Externally framed analysis                                                               |
| Culbert 2005 [53]    | Yes, parents who had received obstetrical or neonatal care at a tertiary perinatal centre, Denmark                                        | Yes, mailed questionnaire with Likert scale<br>Yes, quantitative analysis                                                                                                                       | Closed questions<br>Externally framed analysis                                                                        |

|                        |                                                                                                                                                                                                  |                                                                                                                                              |                                                            |
|------------------------|--------------------------------------------------------------------------------------------------------------------------------------------------------------------------------------------------|----------------------------------------------------------------------------------------------------------------------------------------------|------------------------------------------------------------|
| De Leeuw 2000 [61]     | Yes, Physicians and nurses in 143 NICUs across Europe                                                                                                                                            | Yes, self-administered Questionnaire<br>Yes, quantitative analysis                                                                           | Closed questions<br>Externally framed analysis             |
| Garel 2004 [62]        | Yes, obstetricians and midwives in three tertiary-care maternity units, France                                                                                                                   | Yes, semi-structured interviews<br>Yes, content analysis                                                                                     | Open questions<br>Analysis grounded in the data            |
| Garel 2011 [44]        | Yes, physicians and nurses in three NICUs, France                                                                                                                                                | Yes, semi-structured interviews<br>Yes, content analysis                                                                                     | Open questions<br>Analysis grounded in the data            |
| Hayman 2001 [16]       | Yes, parents who consented or declined to participate in a study of SIDS, New Zealand                                                                                                            | Yes, questionnaire<br>Yes, quantitative analysis                                                                                             | Closed questions<br>Externally framed analysis             |
| Hoehn 2005 [17]        | Yes, parents of neonates having cardiothoracic surgery, a Children's Hospital, Philadelphia, USA                                                                                                 | Yes, Semi-structured qualitative interviews<br>Yes, thematic analysis of spontaneously offered reasons for or against research participation | Open and closed questions<br>Themes emergent from the data |
| Hoehn 2009 [32]        | Yes, parents of neonates with critical congenital heart disease, who had made decisions either for or against research participation before their neonate's cardiothoracic surgery, Chicago, USA | Yes, semi-structured interview<br>Yes, thematic analysis                                                                                     | Open and closed<br>Themes emergent from the data           |
| Hulst 2005 [31]        | Yes, parents or legal representatives of children (pre-term neonates to 18 years) in ICU who were approached for consent to enrol their child in a nutritional assessment study, The Netherlands | No<br>Yes, quantitative analysis                                                                                                             | Closed questions<br>Externally framed analysis             |
| Jollye 2009 [18]       | Yes, parents who had chosen or declined to participate in clinical trials, England                                                                                                               | Yes, semi-structured interviews<br>Yes, thematic analysis                                                                                    | Open questions<br>Themes emergent from the data            |
| Kavanaugh 2005 [37]    | Yes, mothers hospitalised for risk of pre-term birth; their partners, physicians and nurses, USA                                                                                                 | Yes, serial interviews with parents; single interviews with each clinician.<br>Yes, analysed in line with Ottawa Decision Support Framework  | Open questions<br>Externally framed analysis               |
| Korotchikova 2010 [29] | Yes, parents of healthy full-term newborn babies on the postnatal wards in a University                                                                                                          | Yes, observation of presence/ absence partner                                                                                                | Open questions<br>Externally framed analysis               |

|                          |                                                                                                                                                                              |                                                                                                                                                                                                                                                  |                                                                                                          |
|--------------------------|------------------------------------------------------------------------------------------------------------------------------------------------------------------------------|--------------------------------------------------------------------------------------------------------------------------------------------------------------------------------------------------------------------------------------------------|----------------------------------------------------------------------------------------------------------|
|                          | Maternity Hospital, Ireland                                                                                                                                                  | Yes, quantitative analysis according to four principles of the consent process                                                                                                                                                                   |                                                                                                          |
| Maayan-Metzger 2008 [19] | Yes, mothers of healthy term newborns and mothers of stable growing preterm infants with no active disease who had given birth at a large tertiary hospital, Israel          | Yes, questionnaire with Likert scale<br>Yes, quantitative                                                                                                                                                                                        | Closed questions<br>Externally framed analysis                                                           |
| Mason 2000 [34]          | Yes, parents who had been asked for consent to neonatal trials and neonatologists seeking consent, in Europe                                                                 | Yes, semi-structured interviews<br>Yes, quantitative analysis according to four principles of the consent process                                                                                                                                | Open questions<br>Externally framed analysis                                                             |
| McHaffie 2001 [38]       | Yes, doctors and nurses working in six large neonatal intensive care units (NICUs) throughout Scotland                                                                       | Yes, in-depth, face-to-face interviews with semi-structured schedules<br>Unclear, 'Data were entered onto a computer under predetermined variable names, with scope for unlimited values to accommodate the full range of qualitative responses' | Open questions<br>Analysis unclear                                                                       |
| Morley 2005 [20]         | Yes, parents of premature babies in the neonatal intensive care unit, Australia                                                                                              | Yes, questionnaire with multiple choice answers or Likert scale<br>Yes, quantitative                                                                                                                                                             | Closed questions<br>Externally framed analysis                                                           |
| Nathan 2010 [59]         | Yes, parents of neonates undergoing cardiac surgery who had made decisions about research participation before their neonate's surgery, USA                                  | Yes, MacArthur competence assessment tool for clinical research (MacCAT-CR), specifically testing the components of understanding, appreciation, reasoning and choice<br>Yes, quantitative                                                       | Unclear whether questions open or closed<br>Externally framed analysis                                   |
| Paulmichl 2011 [43]      | Yes, clinicians involved in various dilemmas of neonatology (nurses, obstetricians, neuro-paediatricians and neonatologists, midwives and other health professionals such as | Yes, a questionnaire for professionals; for parents, similar questions asked in interviews no more than 30 minutes long                                                                                                                          | Some open, some closed<br>Content analysis and descriptive statistics for analysing answers to questions |

|                   |                                                                                                                                                            |                                                                                                                                                                                  |                                                         |
|-------------------|------------------------------------------------------------------------------------------------------------------------------------------------------------|----------------------------------------------------------------------------------------------------------------------------------------------------------------------------------|---------------------------------------------------------|
|                   | clinical psychologists and physical therapists); and parents of preterm and term infants treated in NICU                                                   |                                                                                                                                                                                  | Unclear to what extent analysis externally framed       |
| Rogers 1998 [55]  | Yes, mothers of low birth weight infants eligible for an RCT of primary care follow-up, Texas, USA                                                         | Yes, structured interviews<br>Yes, RCT of conventional or modified consent procedure                                                                                             | Closed and open questions<br>Pre-set outcomes           |
| Saigal 1999 [63]  | Yes, mothers of infants who weighed less than 1500 g at birth, Ontario, Canada                                                                             | Yes, standardized interviews using the Standard Gamble technique to elicit preferences for 5 pediatric hypothetical health states with varying disabilities<br>Yes, quantitative | Closed questions<br>Externally framed analysis          |
| Schmidt 1999 [57] | Yes, premature infants were eligible for enrollment in a placebo-controlled trial of antithrombin therapy, a university medical centre, Canada             | Yes, physical health status of newborns with parents who consented or refused<br>Yes, quantitative analysis                                                                      | No questions<br>Externally framed analysis              |
| Sharma 2011 [64]  | Yes, women with at least one prior Caesarean in the last 18 months who were eligible to undergo a trial of labour for a subsequent pregnancy, Oregon, USA. | Yes, 45 minutes using a computerized evidence-based decision aid based<br>Yes, quantitative comparison of two decision aid models                                                | Closed questions<br>Externally framed analysis          |
| Simon 2006 [60]   | Yes, parents of children eligible for RCTs of leukemia treatments, Maryland, USA.                                                                          | Yes, observed & recorded informed consent sessions, and interviews<br>Yes, quantitative analysis of references to altruism related to RCT participation                          | Open and closed questions<br>Externally framed analysis |
| Singhal 2002 [26] | Yes, parents of newborn babies in NICU, in a large tertiary referral center and teaching hospital, Canada                                                  | Yes, questionnaire with graded responses and five research scenarios                                                                                                             | Closed questions<br>Externally framed analysis          |
| Singhal 2004 [41] | Yes, doctors and nurses in a large tertiary care center in western Canada                                                                                  | Yes, questionnaire with 20 scaled items and five case scenarios                                                                                                                  | Closed questions<br>Externally framed analysis          |
| Snowdon 1997 [48] | Yes, parents of critically ill newborns who                                                                                                                | Yes, in-depth interviews at 47-140 weeks after birth                                                                                                                             | Open questions<br>Emergent themes                       |

|                    |                                                                                                                      |                                                                              |                                                         |
|--------------------|----------------------------------------------------------------------------------------------------------------------|------------------------------------------------------------------------------|---------------------------------------------------------|
|                    | consented to enrolling in ECMO trial, UK.                                                                            | Yes, thematic analysis with Atlas-ti                                         |                                                         |
| Snowdon 1998 [33]  | Yes, parents whose baby had participated in ECMO trial, and they had received trial results, UK                      | Yes, in-depth interviews<br>Yes, thematic analysis with Atlas-ti             | Open questions<br>Emergent themes                       |
| Snowdon 2004 [42]  | Yes, neonatologists and neonatal pathologists associated with five UK trials                                         | Yes, semi-structured interviews<br>Yes, thematic analysis with Atlas-ti      | Open questions<br>Emergent themes                       |
| Snowdon 2004 [39]  | Yes, bereaved parents from five UK neonatal units                                                                    | Yes, in-depth interviews<br>Yes, thematic analysis with Atlas-ti             | Open questions<br>Emergent themes                       |
| Snowdon 2006 [28]  | Yes, parents of babies, most associated with the neonatal trials; some parents refused consent, some babies died, UK | Yes, in-depth interviews<br>Yes, thematic analysis with Atlas-ti             | Open questions<br>Emergent themes                       |
| Stenson 2004 [35]  | Yes, parents of sick newborns enrolled in a randomised trial in the early neonatal period, Scotland                  | Yes, a short questionnaire using Likert scales<br>Yes, quantitative analysis | Closed and open questions<br>Externally framed analysis |
| Ward 2009 [27]     | Yes, in NICU, in USA, mid-Atlantic hospitals                                                                         | Yes, in-depth interviews;<br>Yes, qualitative content analysis               | Open questions,<br>themes developed from the data       |
| Zupancic 1997 [21] | Yes, parents who had recently given or declined consent to one of three controlled trials in the NICU, Canada        | Yes, questionnaire using Likert scales<br>Yes, quantitative analysis         | Closed questions<br>Externally framed analysis          |
